1 B LYMPHOCYTES, BUT NOT DENDRITIC CELLS, EFFICIENTLY HIV-1 *TRANS*-INFECT  
2 NAÏVE CD4<sup>+</sup> T CELLS: IMPLICATIONS FOR THE VIRAL RESERVOIR

3

4 Abigail Gerberick<sup>a</sup>, Diana C. DeLucia<sup>a,\*</sup>, Paolo Piazza<sup>a</sup>, Mounia Alaoui-El-Azher<sup>b</sup>, Charles R.  
5 Rinaldo<sup>a,c</sup>, Nicolas Sluis-Cremer<sup>b</sup> and Giovanna Rappocciolo<sup>a#</sup>

6 <sup>a</sup>Department of Infectious Diseases and Microbiology, Graduate School of Public Health,  
7 University of Pittsburgh, Pittsburgh, PA, U.S.A.

8 <sup>b</sup>Division of Infectious Diseases, University of Pittsburgh School of Medicine, Pittsburgh, PA,  
9 U.S.A.

10 <sup>c</sup>Department of Pathology, University of Pittsburgh School of Medicine, Pittsburgh, PA, U.S.A.

11

12

13 Running Head: B cell-mediated HIV-1 *trans* infection of naïve T cells

14 #Address correspondence to Giovanna Rappocciolo, [giovanna@pitt.edu](mailto:giovanna@pitt.edu)

15 \*Present address: Fred Hutchinson Cancer Research Center, Department of Human Biology,  
16 Seattle, WA, U.S.A.

17 Abstract word count: 265

18 Text word count: 3,115

19

20

21

22

23

24

25

26

27

28

29

30

31 **Abstract**

32 Insight into the establishment and maintenance of HIV-1 infection in resting CD4<sup>+</sup> T cell subsets  
33 is critical for the development of therapeutics targeting the HIV-1 reservoir. Although the  
34 frequency of HIV-1 infection, as quantified by the frequency of HIV-1 DNA, is lower in CD4<sup>+</sup>  
35 naïve T cells (T<sub>N</sub>) compared to the memory T cell subsets, recent studies have shown that T<sub>N</sub>  
36 cells harbor a large pool of replication-competent virus. Interestingly, however, T<sub>N</sub> cells are  
37 highly resistant to direct (*cis*) HIV-1 infection *in vitro*, in particular to R5-tropic HIV-1, as T<sub>N</sub>  
38 cells do not express CCR5. In this study, we investigated whether T<sub>N</sub> cells could be efficiently  
39 HIV-1 *trans*-infected by professional antigen-presenting B lymphocytes and myeloid dendritic  
40 cells (DC) in the absence of global T cell activation. We found that B cells, but not DC, have a  
41 unique ability to efficiently *trans* infect T<sub>N</sub> cells *in vitro*. In contrast, both B cells and DC  
42 mediated HIV-1 *trans* infection of memory and activated CD4<sup>+</sup> T cells. Moreover, we found that  
43 T<sub>N</sub> isolated from HIV-1-infected nonprogressors (NP) harbor significantly disproportionately  
44 lower levels of HIV-1 DNA compared to T<sub>N</sub> isolated from progressors. This is consistent with  
45 our previous finding that APC derived from NP do not efficiently *trans*-infect CD4<sup>+</sup> T cells due  
46 to alterations in APC cholesterol metabolism and cell membrane lipid raft organization. These  
47 findings support that B cell-mediated *trans* infection of T<sub>N</sub> cells with HIV-1 has a more profound  
48 role than previously considered in establishing the viral reservoir and control of HIV-1 disease  
49 progression.

50 **Importance.** The latent human immunodeficiency virus type 1 (HIV-1) reservoir in persons on  
51 antiretroviral therapy represents a major barrier to a cure. Although most studies have focused  
52 on the HIV-1 reservoir in the memory T cell subset, replication competent HIV-1 has been  
53 isolated from naïve T cells, and CCR5-tropic HIV-1 has been recovered from CCR5<sup>neg</sup>T<sub>N</sub> cells

54 from ART-suppressed HIV-1-infected individuals. In this study, we showed that CCR5<sup>neg</sup>T<sub>N</sub> cells  
55 are efficiently *trans* infected with R-5 tropic HIV-1 by B lymphocytes, but not by myeloid  
56 dendritic cells. Furthermore, we found that T<sub>N</sub> isolated from NP harbor no or significantly less  
57 copies of HIV-1 DNA compared to ART-suppressed progressors. These findings support that B  
58 cell-mediated *trans* infection of T<sub>N</sub> cells with HIV-1 has a more profound role than previously  
59 considered in establishing the viral reservoir and control of HIV-1 disease progression.  
60 Understanding the establishment and maintenance of the HIV-1 latent reservoir is fundamental  
61 for the design of effective treatments for viral eradication.

62

63

64

65

66

67

68

69

70

71

72

73

74

75

76

77

78

79

80

## 81 **Introduction**

82         Latently infected resting CD4<sup>+</sup> T cells constitute a major reservoir of persistent HIV-1  
83 infection. Strategies that lead to a significant reduction or elimination of this reservoir could help  
84 in the development of either a functional or sterilizing cure (1-4). The CD4<sup>+</sup> T cell population is  
85 heterogenous, broadly comprised of naïve (T<sub>N</sub>) and memory cells that differ in lifespan,  
86 proliferative capacity, localization and HIV-1 coreceptor expression. Memory cells are further  
87 categorized by various stages of differentiation, namely central memory (T<sub>CM</sub>), transitional  
88 memory and effector memory. The latent HIV-1 reservoir in memory T cell subsets has been  
89 extensively studied, whereas T<sub>N</sub> cells have been largely overlooked (5, 6). Although resting T<sub>N</sub>  
90 cells are highly resistant to direct, *cis* infection with HIV-1 *in vitro*, we and others have shown  
91 that HIV-1 DNA is detectable in T<sub>N</sub> of viremic and virus-suppressed individuals (7, 8). While the  
92 frequency of HIV-1 infection in T<sub>N</sub> is lower compared to T<sub>CM</sub> cells, as much or more virus is  
93 produced by T<sub>N</sub> cells after reactivation with latency reversing agents (LRAs) (9). Moreover,  
94 paradoxically, CCR5-tropic HIV-1 has been recovered from T<sub>N</sub> despite the fact that they do not  
95 express the CCR5 coreceptor (9-12).

96         HIV-1 can infect its target cells via direct, *cis* infection or through a cell-to-cell transfer  
97 which can result in *trans* infection (13-15). This latter mechanism has been extensively  
98 described as mediated by professional antigen-presenting cells (APC), i.e.,  
99 monocytes/macrophages, myeloid dendritic cells (DC) and B lymphocytes. Indeed, HIV-1 *trans*  
100 infection mediated by APC is 10- to 1000-fold more efficient than passive, *cis* dissemination of  
101 virions through the extracellular milieu (16, 17). We have previously shown that APC derived  
102 from HIV-1-infected nonprogressors (NP) do not efficiently transfer HIV-1 to CD4<sup>+</sup> T cells due  
103 to alterations in APC cholesterol metabolism and cell membrane lipid raft organization (18, 19).

104 In the present study, we show that B lymphocytes, but not DCs, have the exclusive ability to  
105 efficiently *trans* infect T<sub>N</sub> cells with CCR-5 tropic HIV-1. Furthermore, T<sub>N</sub> isolated from HIV-1  
106 NP harbor significantly lower levels of HIV-1 DNA compared to T<sub>N</sub> isolated from HIV-1  
107 progressors (PR). These findings support that B cell-mediated *trans* infection of T<sub>N</sub> cells with  
108 HIV-1 has a more profound role than previously considered in establishing the viral reservoir  
109 and control of HIV-1 disease progression.

110

## 111 **Materials and Methods**

112 **Ethics Statement.** Biological samples were acquired and studied from consented individuals  
113 according to University of Pittsburgh International Review Board approved protocols. All  
114 recruited participants were over the age of 18 and provided written consent prior to sample  
115 collection or use.

116 **Cohort.** Experiments were performed using peripheral blood mononuclear cells (PBMC)  
117 obtained from Pittsburgh Blood Bank anonymous donors (HIV-1 negative, N=6) or archived  
118 PBMC obtained from 7 HIV-1 infected NP and 7 HIV-1 infected PR enrolled in the Pittsburgh  
119 portion of the MACS/WIHS Combined Cohort Study (MWCCS). The NP cohort consisted of 3  
120 long term NP (LTNP, CD4<sup>+</sup> T cells counts >500c/mm<sup>3</sup> over >7 years post infection), 3 elite  
121 controllers (EC, undetectable viral load >7 years post infection) and 1 viremic controller (VC, at  
122 least two viral load measures below 2000 copies HIV-1 RNA/ml).

123 **Generation of CD4<sup>+</sup> T cell subsets.** Naïve and central memory CD4<sup>+</sup> T lymphocytes were  
124 selected from resting PBMC by magnetic bead negative selection according to the  
125 manufacturer's instructions (Milenyi Biotech). T<sub>N</sub> CD4<sup>+</sup> T cells were defined as CD45RA<sup>+</sup>

126 CCR7<sup>+</sup> CCR5<sup>-</sup>, while T<sub>CM</sub> CD4<sup>+</sup> T cells were defined as CD45RA<sup>-</sup> CCR7<sup>+</sup> CCR5<sup>+</sup>. The relative  
127 purity of the separated fractions was determined by flow cytometry.

128 **Cell isolation and culture.** CD4<sup>+</sup> T lymphocytes, B lymphocytes, and CD14<sup>+</sup> monocytes were  
129 positively selected from PBMC using anti-CD4, -CD19, or -CD14 monoclonal antibody (MAb)-  
130 coated magnetic beads (Miltenyi Biotech). Immature DC (iDC) were derived from CD14<sup>+</sup>  
131 monocytes cultured with 1,000 U/ml granulocyte-macrophage colony-stimulating factor (GM-  
132 CSF, Miltenyi Biotech) and 1,000 U/ml recombinant human interleukin-4 (rhIL-4) for 5 days in  
133 AIM-V medium, with additional GM-CSF and rhIL-4 on day 3. Mature DC (mDC) were derived  
134 from iDC by addition of 0.1 µg/ml trimeric CD40L (Enzo) on day 5 and cultured for an  
135 additional 2 days. Prior to coculture, CD4<sup>+</sup> T cells and B cells were activated for 48h with  
136 10U/ml IL-2 (Roche) and 2 µg/ml phytohemagglutinin (PHA, Sigma) or 1,000 U/ml rhIL-4 and  
137 0.1 µg/ml trimeric CD40L (Enzo), respectively. CD4<sup>+</sup> T<sub>N</sub> or T<sub>CM</sub> cells were treated with either  
138 100nM CCL-19 (R&D Systems) or 10U/ml IL-2 and 2 µg/ml PHA as described. (12, 15)

139 **Cell phenotyping.** Cells were assessed for surface protein expression by flow cytometry. B cell  
140 + T<sub>N</sub> and DC + T<sub>N</sub> cocultures or T<sub>N</sub> cells alone were incubated with LIVE/DEAD fixable aqua  
141 viability cell stain kit (Invitrogen) for 20 min and then subsequently incubated with monoclonal  
142 antibodies (mAb) against CD3 (APC-H7), CD4 (V450), CCR5 (PE), CD45RA (PE-CF594),  
143 CCR7(APC), and CD27 (FITC) for 20 min. Cells were fixed with 1% paraformaldehyde (PFA),  
144 acquired with a BD LSR Fortessa and analyzed with FlowJo V10. The gating strategy is  
145 described in Supplemental Figure 1. Mature DC were also stained for siglec-1 expression  
146 (CD169-PE)

147 Virus stock titration and experimental p24 measurements were acquired by enzyme-  
148 linked immunosorbent assay (ELISA) using the HIV-1 p24 antigen capture immunoassay

149 (Leidos Biomedical Research, Frederick National Laboratory for Cancer Research) per the  
150 manufacturer's instructions. HIV-1 Gag p24 was also evaluated in *trans* and *cis* infection  
151 cocultures by flow cytometry. Briefly, cocultures were harvested and incubated with  
152 LIVE/DEAD fixable aqua viability stain kit (Invitrogen) for 20 min and then incubated for  
153 surface staining with monoclonal antibodies against CD3 (APC-H7), CD4(PE), CD19(PE-  
154 CF594) for 20 min. Cells were then permeabilized with PermII buffer (BD) for 20 min, washed  
155 and then incubated with anti- HIV-1 p24 antibody Kc57-FITC (Coulter), incubated for 20 min,  
156 washed and resuspended in 1% PFA prior to analysis with a BD LSR Fortessa. Acquired data  
157 were analyzed with FlowJo V10. The gating strategy is described in supplemental figure 2

158

159 ***Trans* and *cis* infection.** R5-tropic HIV-1<sub>BaL</sub>, grown in and purified from PM1 cells (20)  
160 (American Type Culture Collection) was used for *cis* and *trans* infection experiments. A patient  
161 isolate R5-tropic-HIV-1 BX08(92FR\_BX08) used in *trans* and *cis* experiments was obtained  
162 from the NIH AIDS Reagents Program, Division of AIDS, NIAID, NIH:HIV-1  
163 BX08(92FR\_BX08) virus(cat#11420) from Dr. Victoria Polonis (21). (i) *Trans infection*:  $1 \times 10^6$   
164 APC were incubated with a low concentration of HIV-1<sub>BaL</sub> or HIV-1BX08 (m.o.i.  $10^{-3}$ ) for 2h at  
165 37°C and then washed 3 times with cold medium. Virus-loaded APC were cocultured with  
166 autologous CD4<sup>+</sup> T cell targets at 1:10 effector/target ratio in R10 medium. (ii) *Cis infection*:  $1 \times$   
167  $10^6$  activated CD4<sup>+</sup> T cells were incubated with a high ( $10^{-1}$ ) m.o.i. of HIV-1<sup>BaL</sup> or HIV-1BX08  
168 and cultured independently. HIV-1 Gag p24 levels were quantified in cell-free supernatants at  
169 days 4, 8, and 12 post coculture. In some experiments, stimulated B cells were incubated with  
170 20µg/ml anti-DC-SIGN mAb (clone 120507, R&D system) or mouse IgG (R & D Systems) for

171 30 min at 4°C prior to incubation with virus. In some experiments, T<sub>N</sub> were incubated with  
172 maraviroc (1µM) as previously described (22)

173

174 **Reactivation of latent HIV-1 from APC-TN cocultures.** Eight days after the start of APC-T<sub>N</sub>  
175 cocultures, cells were treated with 10 nM phorbol myristate acetate (PMA; Sigma-Aldrich) and  
176 10 µg/ml PHA (PMA-PHA). Supernatants were collected at day 11, 14 and 17. Levels of HIV-  
177 1Gag p24 were then tested by ELISA. Parallel untreated cultures were used as control.

178 **Quantification of total HIV-1 DNA.** Total HIV-1 DNA in CD4<sup>+</sup> T cells was quantified as  
179 described previously (23).

180 **Statistics.** Data were analyzed by one-way analysis of variance. Student t tests were used to  
181 compare two groups. GraphPad prism 7.0 Software was used for statistical analysis.

182

## 183 **Results**

184 **B cells *trans* infect CD4<sup>+</sup> T cells with high efficiency.** B cells activated with CD40L and IL4,  
185 which mimics signals received from activated CD4<sup>+</sup> T cells, express the C-type lectin DC-  
186 specific intercellular adhesion molecule-3-grabbing non-integrin (DC-SIGN) and can capture  
187 HIV-1, leading to *trans* infection of CD4<sup>+</sup> T cells (24). In this study, we first extended this  
188 finding by demonstrating that B cells or DC loaded with a low, 10<sup>-3</sup> m.o.i. of R5-tropic HIV-1<sub>BaL</sub>  
189 could *trans* infect PHA/IL2 activated CD4<sup>+</sup> T cells, with the efficiency of *trans* infection being  
190 significantly greater for B cells compared to DC (Figure 1A). This is of importance because, as  
191 we showed previously, only about 10-15% of activated B cells express DC-SIGN, compared to



192 100% of DC , therefore making B cells extraordinarily efficient in mediating HIV-1 *trans*  
193 infection. In agreement with our previous findings (15), CD4<sup>+</sup> T cells were refractory to *cis* HIV-  
194 1 infection at the same low 10<sup>-3</sup> m.o.i., but were productively infected with a 100-fold greater  
195 dose of 10<sup>-1</sup> m.o.i. (Figure 1B). We conclude from these data that B lymphocytes, activated by  
196 two surrogates for CD4<sup>+</sup> T helper cells, i.e., IL4 and CD40L, are more efficient than myeloid DC  
197 in mediating HIV-1 *trans* infection of activated CD4<sup>+</sup> T lymphocytes.

198

199 **B cells, but not DC, *trans* infect naïve CD4<sup>+</sup> T cells *in vitro*.** CD4<sup>+</sup> T<sub>N</sub> cells do not express  
200 CCR5; however, *in vivo*, T<sub>N</sub> cells harbor R5-tropic HIV-1 (10, 11, 25, 26). We therefore  
201 hypothesized that T<sub>N</sub> are infected through an APC-mediated *trans* infection mechanism that does  
202 not require CCR5 expression by the T cells. To test this hypothesis, we used purified T<sub>N</sub> and T<sub>CM</sub>  
203 cells as targets for *trans* infection mediated by autologous B lymphocytes or DC that were  
204 loaded with 10<sup>-3</sup> m.o.i. of R5 tropic HIV-1<sub>BaL</sub>. Consistent with the approach described in Figure  
205 1, we initially used PHA/IL2-activated CD4<sup>+</sup> T<sub>N</sub> and T<sub>CM</sub> cells as targets. As shown in Figure  
206 2A, B cells were able to productively *trans* infect either T<sub>N</sub> or T<sub>CM</sub> with R5 tropic HIV-1,  
207 whereas DC only *trans* infected the T<sub>CM</sub> subset.

208 PHA/IL2 treatment of CD4<sup>+</sup> T<sub>N</sub> and T<sub>CM</sub> induces T cell activation, thus rendering them  
209 more susceptible to HIV-1 infection. Therefore, we next assessed B cell- and DC-mediated HIV-  
210 1<sub>BaL</sub> *trans* infection of T<sub>N</sub> and T<sub>CM</sub> cells treated with the chemokine CCL19. As described  
211 previously (12), CCL19 neither elicits T cell activation nor induces CCR5 or CXCR4 expression,  
212 but enhances *cis* HIV-1 infection of resting CD4<sup>+</sup> T cells. As shown in Figure 2B, only B cells  
213 were able to *trans* infect CCL19-treated T<sub>N</sub>, resulting in detectable HIV-1 Gag p24 in the  
214 coculture supernatants. In contrast, neither mDC nor iDC mediated *trans* infection, showing that

215 the ability of DC to *trans* infect T<sub>N</sub> did not depend on their maturation status. As expected, T<sub>N</sub>  
216 were refractory to direct *cis* infection of HIV-1<sub>BaL</sub> using either PHA/IL2 or CCL19 conditioned  
217 media, while only total CD4<sup>+</sup> T cells were susceptible to productive *cis* infection (Figure 2C).  
218 Our findings were further confirmed using an R5-tropic patient isolate, HIV-1  
219 BX08(92FR\_BX08), obtained from the NIAID AIDS Reagent Repository (21). As shown in  
220 panels 2D and 2E, B cells could efficiently *trans* infect both total CD4<sup>+</sup> T and T<sub>N</sub> cells, while  
221 iDC could only *trans* infect total CD4<sup>+</sup> T cells. *Cis* infection of T<sub>N</sub> cells was undetectable (not  
222 shown). Taken together, these results support that B lymphocytes have a unique ability to  
223 mediate highly productive *trans* infection of naïve CD4<sup>+</sup> T cells with R5-tropic HIV-1.

224

225 **Coculture with B cells or DC does not affect the T<sub>N</sub> phenotype.** To address whether the CD4<sup>+</sup>  
226 T<sub>N</sub> phenotype was altered through coculture with the APC, potentially affecting their efficiency  
227 of being *trans* infected with HIV-1, we analyzed T<sub>N</sub> cells for CCR5 and CD27 expression. T<sub>N</sub>  
228 cultured alone served as a control. CD27 expression was chosen instead of CCR7 expression  
229 because CCL19 can induce downregulation of CCR7. The flow cytometry gating strategy is  
230 shown in Supplemental Figure S1. As shown in Figure 3A, neither B cells nor DC induced a  
231 significantly higher expression of CCR5, up to 12 days in culture (1-way ANOVA), although we  
232 detected a slight increase of CCR5 between day 8 and 12 in the DC-T<sub>N</sub> cocultures. Expression of  
233 the CD27 marker also remained unchanged throughout the coculture period (Figure 3B).

234 These data show that there is no significant alteration of the T<sub>N</sub> phenotype during  
235 coculture with APCs, and confirm that B cells can establish HIV-1<sub>BaL</sub> infection in T<sub>N</sub> in the  
236 absence of significant CCR5 coreceptor expression.

237           **Detection of intracellular HIV-1 p24 in APC- T<sub>N</sub> cocultures.** Given the slight increase  
238 of CCR5 in the DC-T<sub>N</sub> cocultures, we next questioned if the detection of HIV-1 p24 we  
239 measured in the *trans* infection coculture supernatant reflected p24 intracellular localization. We  
240 therefore stained cells collected from the *trans* infection wells and examined them for p24  
241 expression by flow cytometry. As shown in Figure 4, we were able to detect intracellular HIV-1  
242 p24 in the cocultures of B cells with either total CD4<sup>+</sup> T or T<sub>N</sub>. In the DC mediated *trans*  
243 infection cocultures, we could only detect HIV-1 p24 in the DC-total CD4<sup>+</sup>T cell wells, with  
244 very low levels in the DC-T<sub>N</sub> cocultures. Taken together, these data further support the  
245 conclusion that only B lymphocytes can efficiently *trans* infect T<sub>N</sub> cells.

246           **B cell *trans* infection of T<sub>N</sub> cells is mediated by DC-SIGN.** We have previously shown  
247 that B cell *trans* infection of CD4<sup>+</sup>T cells is inhibited by blocking of DC-SIGN (15). Therefore,  
248 we tested if DC-SIGN was also necessary to mediated *trans* infection of T<sub>N</sub> cells. As shown in  
249 Figure 5A, blocking of B cells with anti-DC-SIGN mAb significantly inhibited *trans* infection of  
250 T<sub>N</sub>. We also treated T<sub>N</sub> cells with maraviroc, a chemokine co-receptor 5 (CCR5) antagonist, to  
251 determine if any amount of CCR5 expressed by T<sub>N</sub> in the *trans* infection cocultures could be  
252 responsible for the infection. As expected, treatment with maraviroc did not significantly inhibit  
253 the efficient *trans* infection of T<sub>N</sub> (Figure 5A). These data were also confirmed by HIV-1 p24  
254 intracellular staining of *trans* infection cocultures (Figure 5B).

255           It has been proposed that siglec-1 (CD169) is a key factor for efficient DC-mediated  
256 HIV-1 *trans* infection with DC matured by lipopolysaccharide (28). Since our DC were used as  
257 immature cells or matured with CD40L/IL4, we tested if the inefficient *trans* infection of T<sub>N</sub> cells  
258 by DC was due to lack of siglec-1 expression, although both B cells and DC could efficiently  
259 *trans* infect total CD4<sup>+</sup> T cells. We found that CD40L/IL4-matured DC expressed siglec-1

260 (Figure 5C), excluding the possibility that that this receptor contributed to the observed  
261 phenotype.

262 **Reactivation of HIV-1 from T<sub>N</sub>.** To assess whether HIV-1 *trans* infection of T<sub>N</sub> cells mediated  
263 by B cells or DC resulted in HIV-1 latency, T<sub>N</sub> cells were cultured with either HIV-1<sub>BaL</sub>-loaded B  
264 cells or DC for 8 days and then treated with PMA/PHA, and culture supernatants were harvested  
265 every 3 days for p24 analysis (Fig.6A). As shown in Figure 6B, HIV-1 was recovered only from  
266 the B-T<sub>N</sub> cocultures. This indicates that the lack of detectable virus replication in the DC-T<sub>N</sub> was  
267 not due to the establishment of latency without detectable viral replication in the T<sub>N</sub>.

268 **CD4<sup>+</sup> T<sub>N</sub> cells from HIV-1-infected NP harbor less total HIV-1 DNA.** We have  
269 previously shown that APC from NP cannot *trans* infect autologous and heterologous CD4<sup>+</sup> T  
270 cells, and that this phenotype is under control of cellular cholesterol homeostasis regulation (18,  
271 19). Furthermore, this characteristic is present prior to infection with HIV-1, indicating that it is  
272 an innate, genetically controlled phenotype. If B cell-mediated *trans* infection of T<sub>N</sub> is an  
273 important mechanism by which these cells become infected with HIV-1, then it is plausible that  
274 NP have a reduced or absent level of HIV-1 DNA in this CD4<sup>+</sup> T cell subset. We therefore  
275 quantified the viral DNA reservoir in total CD4<sup>+</sup> T cells and T<sub>N</sub> cells from 7 NP not under ART  
276 at the time of testing, and 7 PR on ART (Figure 7). The results show that we could not detect  
277 HIV-1 DNA in T<sub>N</sub> from NP classified as elite controllers (EC), while a relatively low number of  
278 HIV-1 DNA copies were detected in LTNP and VC (19). Overall, the average copy number of  
279 HIV-1 DNA in T<sub>N</sub> from NP was lower compared to the number of copies detected in the 7 PR  
280 ART-suppressed participants ( $p = 0.007$ ). Both NP and PR had similar levels of HIV-1 DNA  
281 copies when total CD4<sup>+</sup> T cells were tested. Given that CD4<sup>+</sup> T cells from NPs are susceptible to  
282 direct, *cis* infection as well as CD4<sup>+</sup>T cells from PR (19), the evidence supports the concept that

283 the low amount of HIV-1 DNA detected is the result of direct infection. Taken together, these  
284 data suggest that individuals naturally able to control HIV-1 disease progression have a reduced  
285 or absent HIV-1 reservoir in their T<sub>N</sub> population.

286

## 287 **Discussion**

288 Here we show that B lymphocytes have the unique ability to *trans* infect CD4<sup>+</sup> T<sub>N</sub> cells *in*  
289 *vitro* with an R5 tropic HIV-1 laboratory strain (HIV-1<sub>BaL</sub>) and an R5 clinical isolate (HIV-1  
290 BX08(92FR\_BX08)), compared to myeloid DC. Prior studies have shown that T<sub>N</sub> cells can be  
291 infected *in vitro* with CXCR4-tropic HIV-1 when pretreated with the chemokine CCL19, the  
292 ligand for the CCR7 receptor, which expression significantly increases during the acute phase of  
293 infection when the latent reservoir is established (9, 29). This treatment does not alter the  
294 activation or proliferation state of T<sub>N</sub> cells, and does not induce significant expression of the  
295 CCR5 co-receptor. Therefore, this model was used in our study to preserve the phenotype of the  
296 T<sub>N</sub> population, which remained resistant to *cis* infection with an R-5 tropic HIV strain.  
297 Furthermore, exposure of T<sub>N</sub> cells to B cells loaded with R-5 tropic HIV-1<sub>BaL</sub> during the  
298 coculture period did not induce higher expression of the CCR5 receptor, thus excluding the  
299 possibility that the efficient *trans* infection we observed was the result of *in vitro* conditions.  
300 Efficient transfer of HIV-1 to T<sub>N</sub> mediated by B cells was also confirmed by detection of  
301 intracellular HIV-1 p24 by flow cytometry.

302 We have previously shown that activated B cells are able to bind and internalize HIV-1  
303 into cytoplasmic vesicles through DC-SIGN (15), and can *trans* infect CD4<sup>+</sup> T cells for up to two  
304 days with high efficiency. Furthermore, we have demonstrated that *trans* infection of total CD4<sup>+</sup>

305 T cells can be inhibited by treatment with anti-DC-SIGN mAb. Here, we have confirmed that  
306 inhibition of DC-SIGN expression on B cells also impairs *trans* infection of T<sub>N</sub>. Notably, B cells  
307 do not support HIV-1 replication (15). Therefore, the second, *cis* infection phase in DC-mediated  
308 HIV-1 *trans* infection (30) is not applicable to B lymphocytes. Since cell-to-cell mediated spread  
309 of HIV-1 is several orders of magnitude more efficient compared to direct *cis* infection of target  
310 cells (17), this mode of virus dissemination could have a significant role in HIV pathogenesis,  
311 particularly in T cell-APC dense anatomical compartments (16, 31). We propose that this *trans*  
312 infection process is likely intertwined with basic immunologic interactions of B lymphocytes and  
313 naïve T cells. Indeed, B cells were recently described as having a broad role in the development  
314 of T<sub>N</sub> cells (32). The interaction between B cells and T<sub>N</sub> cells thus goes beyond the classical  
315 initiation of antigen-specific B cell differentiation into antibody producing plasma cells. In fact,  
316 evidence suggests that B cells are necessary and sufficient to prime and activate T<sub>N</sub> cells in  
317 response to virus-like particles (32). Thus, unique features of interactions between B and T<sub>N</sub> cells  
318 could drive the transfer and replication of HIV-1. Notably, it is known that B cells are superior to  
319 DC in capturing high doses of cognate antigen through high affinity antigen-specific receptors,  
320 therefore rendering B cell-mediated antigen stimulation more efficient than DC (33). In T-  
321 dependent B cell immune responses, antigen-engaged B cells must find their cognate helper T  
322 cells to initiate the progression of B cell immune responses. Within the lymph node follicle, B  
323 cells move continuously to survey the subcapsular (SCS) macrophages for surface-displayed  
324 antigens (34, 35) and are also receiving survival signals from fibroblastic reticular cells (FRC)  
325 (36) such as the B cell activator BAFF, which has been shown to activate B cells to express DC-  
326 SIGN (37). These B cells are positioned to capture HIV-1 either as free virus entering through  
327 the afferent lymph vessel or through sampling of SCS macrophages (33) which have poor

328 endocytic capacity and limited degradative ability (35). This ultimately prevents them from  
329 efficiently degrading HIV-1. In this scenario, subcapsular B cells activated through a T-  
330 independent mechanism are perfectly positioned to capture HIV-1 particles while surveying the  
331 environment for their specific antigen.

332         Upon encounter with antigen, signaling via the B cell receptor (BCR) starts the sequence  
333 of events that will bring the antigen-specific B cells to the follicle-T zone boundary where they  
334 will search for their cognate CD4<sup>+</sup> T cell among the T<sub>N</sub> cells residing there (38). This interaction  
335 provides an opportunity for transfer of HIV-1 that has been captured by B cells to the CD4<sup>+</sup> T  
336 cells This interaction at the follicle-T cell zone interface of lymph nodes can last from several  
337 minutes to an hour (39, 40), and requires the interaction of integrins, such as LFA1 on T helper  
338 cells interacting with ICAM-1 or ICAM-2 on B cells, as well as co-stimulatory molecule CD86  
339 signaling of CD28. Crucially, these interactions are stabilized by the antigenic peptide presented  
340 by B cell-expressed MHC class II. B cells capture antigen with high affinity through the B cell  
341 receptor (BCR), allowing for even low concentration of antigen to result in high internalization  
342 and subsequent presentation to T cells (41) and upregulation of the costimulatory molecule  
343 CD86 expression. On the other hand, DC capture antigen through nonspecific binding, requiring  
344 higher levels of antigen to induce a CD4<sup>+</sup> T cell response. Moreover, the interaction between DC  
345 and T<sub>N</sub> helper cells is not as long lived, resulting in a lower chance of virus being transferred,  
346 even though activated B cell and DC express costimulatory molecules involved in the formation  
347 of the immunological synapse. Thus, the unique features of the interactions between B and T<sub>N</sub>  
348 cells could drive the transfer of HIV-1 to T<sub>N</sub> with higher efficiency compared to DC.

349         Although T<sub>N</sub> cells represent the more abundant fraction of CD4<sup>+</sup> T cells, most studies of  
350 the latent HIV-1 reservoir have focused on T<sub>M</sub> cells because they harbor the highest levels of

351 HIV-1 DNA in people under ART. We and others (9, 12, 26) have shown that although the  
352 frequency of HIV-1 infection in these cells is lower compared to other subsets, as much or more  
353 virus is produced by these cells after treatment with latency-reactivation agents (LRA). This is  
354 true also when T<sub>N</sub> cells isolated from HIV-1 infected individuals under ART are exposed to  
355 LRA. Paradoxically, although T<sub>N</sub> do not express the HIV-1 co-receptor CCR5, they harbor  
356 CCR5-tropic virus *in vivo*. Therefore, an understanding on how this subset of CD4<sup>+</sup> T cells  
357 becomes infected could provide important clues in the development of strategies to thwart the  
358 early establishment of HIV-1 infection.

359 As we have previously shown, efficient APC-mediated *trans* infection is regulated by  
360 APC membrane cholesterol content, and is related to the control of HIV-1 disease progression  
361 (18, 19). In fact, APC derived from HIV-1-infected NP have an innate inability to *trans* infect  
362 CD4<sup>+</sup> T cells, and this phenotype can be reversed by replenishing cell membrane cholesterol. On  
363 the other hand, APC from HIV-1-infected individuals with progressing disease, i.e., PR, mediate  
364 efficient HIV-1 *trans* infection (18, 19). Here we quantified the viral reservoirs in total CD4<sup>+</sup> T  
365 and T<sub>N</sub> from NP and PR in the Pittsburgh clinical site of the MWCCS. Notably, while the PR  
366 studied here were under suppressive ART, all the NP tested were therapy naïve at the time of the  
367 study. We could not detect viral DNA in NPs classified as EC, while a significantly smaller  
368 number of HIV-1 DNA copies was detected in LTNP and VC compared to PR. These data  
369 strongly suggest that the altered ability to *trans* infect CD4<sup>+</sup> T cells in NP results in a small or  
370 negligible pool of latently infected T<sub>N</sub> cells, thus contributing to the maintenance of the NP  
371 phenotype, at levels even lower than those detectable in patients under suppressive ART.  
372 Although limited in scope, our findings are also consistent with that observed in the French  
373 Virological and Immunological Studies in Controllers After Treatment Interruption (VISCONTI)



374 cohort of individuals that received ART within 10 weeks of primary infection (42), where  
375 viremia was controlled for 24 months post-treatment interruption. In that cohort, HIV-1 DNA  
376 was detected in  $T_N$  of only 2 out of 11 patients, while the other T cell subsets harbored  
377 comparable levels of HIV-1 DNA. Our present study suggests that early, B cell-mediated *trans*  
378 infection could be an important mechanism by which HIV-1, regardless of its basic cell tropism,  
379 establishes infection in  $T_N$  cells. We propose an additional role for B cell-mediated *trans*  
380 infection, not only as an efficient means to spread HIV-1 to  $CD4^+$  T cells, but as the driver in  
381 establishing the HIV-1 reservoir in  $T_N$  and potential consequent control of HIV-1 disease  
382 progression.

### 383 **Acknowledgments**

384 The authors wish to thank Kathleen Hartle and Patrick Mehta for technical assistance and the  
385 Pitt Men's Study staff and volunteers for their support. This work was supported by the National  
386 Institute of Health grants R01AI118403, U01-AI35041, U01 HL146208, T32AI065380.

387 **Figure 1. B cells *trans* infect  $CD4^+$  T cells with higher efficiency than DC. A.** B lymphocytes  
388 and DC were loaded with HIV-1<sup>BaL</sup> ( $10^{-3}$  m.o.i.) as described in Materials and Methods and  
389 mixed with PHA/IL2 activated autologous  $CD4^+$  T cells at a 1:10 ratio for up to 12 days (*trans*  
390 infection).  $CD4^+$  T cells were also pulsed with HIV-1<sup>BaL</sup> ( $10^{-3}$  m.o.i.) and cultured alone (*cis*  
391 infection). Coculture supernatants were tested at the indicated time points for HIV Gag p24  
392 levels by ELISA. **B.**  $CD4^+$  T cells were loaded with HIV-1<sup>BaL</sup> ( $10^{-1}$  m.o.i.) and cultured up to 12  
393 days. Cultures supernatants were tested at the indicated time points for HIV Gag p24 levels by  
394 ELISA. Data are mean value  $\pm$ SE; N=8.; \* $p < 0.05$  \*\* $p < 0.001$ .

395 **Figure 2. Only B cells *trans* infect T<sub>N</sub>.** **A:** B cells or DC were pulsed with HIV-1<sup>BaL</sup> (10<sup>-3</sup>  
396 m.o.i.) for 2h at 37C, extensively washed and cocultured with PHA/IL2 activated purified naïve  
397 (T<sub>N</sub>; N=5) or central memory (T<sub>CM</sub>; N=4) CD4<sup>+</sup>T cells. Culture supernatants were collected at the  
398 times indicated and tested for HIV Gag p24. Mean±SE. **B.** T<sub>N</sub> cells were treated with CCL-19,  
399 washed and mixed with B cells, immature DC (iDC), or CD40L matured DC (mDC), pulsed with  
400 HIV-1<sup>BaL</sup> (10<sup>-3</sup> m.o.i.). Cell culture supernatants were collected at the indicated time points and  
401 tested for HIV Gag p24 by ELISA. Mean±SE, N=6. **C:** Total CD4<sup>+</sup> T or T<sub>N</sub> cells were treated  
402 with PHA/IL2 or CCL-19 alone as described in Materials and Methods, washed and directly  
403 infected with HIV-1<sub>BAL</sub> (10<sup>-1</sup> m.o.i.). Cell culture supernatants were collected at the indicated  
404 time points and tested for HIV-1 Gag p24 by ELISA. Mean±SE, N=4 **D.** B cells pulsed with  
405 HIV-1 92FR\_BX08 (10<sup>-3</sup> m.o.i.) were mixed with total CD4<sup>+</sup> or T<sub>N</sub> cells treated with CCL-19,  
406 washed and mixed with as described in Materials and Methods and cultured for up to 12 days. **E.**  
407 iDC pulsed with HIV-1 92FR\_BX08 (10<sup>-3</sup> m.o.i.) were mixed with total CD4<sup>+</sup> or T<sub>N</sub> cells as  
408 described in Materials and Methods and cultured for up to 12 days. Cell cultures supernatants  
409 were collected at the indicated time points and tested for HIV-1 Gag p24 by ELISA. Mean±SE,  
410 N=6 independent cultures.

411 **Figure 3. Coculture with B cells or DC does not affect T<sub>N</sub> phenotype.** **A.** T<sub>N</sub> cells were  
412 cultured alone (top row) or cocultured with HIV-1<sup>BaL</sup> pulsed B cells or DC (middle and bottom  
413 row, respectively), sampled at the indicated time points, stained with anti-CCR5 and CD27 mAB  
414 and analyzed by FACS as described in Materials and Methods. Representative data from 3  
415 independent experiments. **B.** CCR5 and CD27 percent positive cells in T<sub>N</sub> control culture or  
416 cocultures. Mean±SE, N=3.

417 **Figure 4. Detection of HIV-1 p24 antigen in *trans* infection coculture with B cells or DC:** B  
418 cells or DC loaded with HIV-1 ( $10^{-3}$  m.o.i) were cultured with total CD4<sup>+</sup> T or T<sub>N</sub> cells, sampled  
419 after 8 days, and stained with anti-Kc57, -CD4, -CD3, or -CD19 and analyzed by FACS as  
420 described in Materials and Methods.. **Cis infection:** CD4<sup>+</sup> T or T<sub>N</sub> cells were infected with HIV-  
421 1<sup>BaL</sup> ( $10^{-1}$  m.o.i.) cultured, stained, and analyzed by flow cytometry in parallel to the *trans*  
422 infection cocultures. Representative data from 2 independent experiments.

423 **Figure 5. B cell-mediated *trans* infection of T<sub>N</sub> cells is inhibited by anti-DC-SIGN blocking.**  
424 **A.** B cells were incubated with 20µg/ml anti DC-SIGN mAb for 1h at 4C prior to pulsing with  
425 HIV-1<sup>BaL</sup> ( $10^{-3}$  m.o.i.) and cocultured with T<sub>N</sub> cells for *trans* infection as described in Materials  
426 and Methods. Supernatants were collected after 12 days and tested for HIV Gag p24 by ELISA.  
427 B cells treated with mouse IgG (20µg/ml) were used as untreated control. Mean±SE, N=6  
428 independent cultures. **B.** In parallel cultures, T<sub>N</sub> cells were treated with Maraviroc (1µM) as  
429 described in Materials and Methods and cocultured with HIV-1<sup>BaL</sup> pulsed B cells for *trans*  
430 infection. Supernatants were collected after 12 days and tested for HIV-1 Gag p24 by ELISA.  
431 Mean±SE, N=6 independent cultures. **C.** DC matured with CD40L/IL4 were collected and  
432 stained for CD169 (Siglec-1) expression (black histogram) and compared to an isotype control  
433 (grey histogram) isotype control. Representative of 2 independent experiments.

434 **Figure 6. Detection of virus after LRA reactivation.** **A.** Schematic representation of the  
435 experimental approach to measure reversal of HIV-1 latency in T<sub>N</sub> cells *trans* infected by B cells  
436 or DC. **B.** cocultures treated with LRA activators at day 8 and then sampled at the indicated time  
437 point after reactivation. Supernatants were tested for HIV Gag p24 by ELISA.

438 **Figure7. Quantification of total HIV-1 DNA in CD4<sup>+</sup> total and T<sub>N</sub> cells.** Each dot represents a  
439 unique donor. Statistical comparison was analyzed using a Wilcoxon matched-pairs signed rank  
440 test. A p value < 0.05 was considered significant

441

442 **Supplemental Figure 1. Gating Strategy to determine T<sub>N</sub> phenotype** Lymphocytes were  
443 gated first based on forward and side scatter, followed by doublet event exclusion, then by  
444 exclusion of dead cells (Aqua dye positive). CD4<sup>+</sup> positive cells were then gated into CD45RA  
445 negative and CD45RA positive populations, with the latter population being 100% CCR7  
446 positive as well as CCR5 negative.

447 **Supplemental Figure 2. Gating Strategy to determine intracellular HIV-1 p24.** Lymphocytes  
448 were gated first based on forward and side scatter, followed by doublet event exclusion, then by  
449 exclusion of dead cells (Aqua dye positive). CD4<sup>+</sup>/HIV p24<sup>+</sup> cells were then gated within the  
450 CD4<sup>+</sup>/CD3<sup>+</sup> population

451

452

453

454

455

456

457

458

459

460

461

462 References

463

- 464 1. Chun TW, Stuyver L, Mizell SB, Ehler LA, Mican JA, Baseler M, Lloyd AL, Nowak MA, Fauci AS.  
465 1997. Presence of an inducible HIV-1 latent reservoir during highly active antiretroviral therapy.  
466 Proc Natl Acad Sci U S A 94:13193-7.
- 467 2. Eisele E, Siliciano RF. 2012. Redefining the viral reservoirs that prevent HIV-1 eradication.  
468 Immunity 37:377-88.
- 469 3. Finzi D, Blankson J, Siliciano JD, Margolick JB, Chadwick K, Pierson T, Smith K, Lisziewicz J, Lori F,  
470 Flexner C, Quinn TC, Chaisson RE, Rosenberg E, Walker B, Gange S, Gallant J, Siliciano RF. 1999.  
471 Latent infection of CD4+ T cells provides a mechanism for lifelong persistence of HIV-1, even in  
472 patients on effective combination therapy. Nat Med 5:512-7.
- 473 4. Finzi D, Hermankova M, Pierson T, Carruth LM, Buck C, Chaisson RE, Quinn TC, Chadwick K,  
474 Margolick J, Brookmeyer R, Gallant J, Markowitz M, Ho DD, Richman DD, Siliciano RF. 1997.  
475 Identification of a reservoir for HIV-1 in patients on highly active antiretroviral therapy. Science  
476 278:1295-300.
- 477 5. Chomont N, El-Far M, Ancuta P, Trautmann L, Procopio FA, Yassine-Diab B, Boucher G, Boulassel  
478 MR, Ghattas G, Brenchley JM, Schacker TW, Hill BJ, Douek DC, Routy JP, Haddad EK, Sekaly RP.  
479 2009. HIV reservoir size and persistence are driven by T cell survival and homeostatic  
480 proliferation. Nat Med 15:893-900.
- 481 6. Schnittman SM, Lane HC, Greenhouse J, Justement JS, Baseler M, Fauci AS. 1990. Preferential  
482 infection of CD4+ memory T cells by human immunodeficiency virus type 1: evidence for a role  
483 in the selective T-cell functional defects observed in infected individuals. Proc Natl Acad Sci U S  
484 A 87:6058-62.
- 485 7. Dai J, Agosto LM, Baytop C, Yu JJ, Pace MJ, Liszewski MK, O'Doherty U. 2009. Human  
486 immunodeficiency virus integrates directly into naive resting CD4+ T cells but enters naive cells  
487 less efficiently than memory cells. J Virol 83:4528-37.
- 488 8. Zerbato JM, Purves HV, Lewin SR, Rasmussen TA. 2019. Between a shock and a hard place:  
489 challenges and developments in HIV latency reversal. Curr Opin Virol 38:1-9.
- 490 9. Zerbato JM, Serrao E, Lenzi G, Kim B, Ambrose Z, Watkins SC, Engelman AN, Sluis-Cremer N.  
491 2016. Establishment and Reversal of HIV-1 Latency in Naive and Central Memory CD4+ T Cells In  
492 Vitro. J Virol 90:8059-73.
- 493 10. Ostrowski MA, Chun TW, Justement SJ, Motola I, Spinelli MA, Adelsberger J, Ehler LA, Mizell SB,  
494 Hallahan CW, Fauci AS. 1999. Both memory and CD45RA+/CD62L+ naive CD4(+) T cells are  
495 infected in human immunodeficiency virus type 1-infected individuals. J Virol 73:6430-5.
- 496 11. Wightman F, Solomon A, Khoury G, Green JA, Gray L, Gorry PR, Ho YS, Saksena NK, Hoy J, Crowe  
497 SM, Cameron PU, Lewin SR. 2010. Both CD31(+) and CD31(-) naive CD4(+) T cells are persistent

- 498 HIV type 1-infected reservoirs in individuals receiving antiretroviral therapy. *J Infect Dis*  
499 202:1738-48.
- 500 12. Zerbato JM, McMahon DK, Sobolewski MD, Mellors JW, Sluis-Cremer N. 2019. Naive CD4+ T  
501 Cells Harbor a Large Inducible Reservoir of Latent, Replication-Competent HIV-1. *Clin Infect Dis*  
502 doi:10.1093/cid/ciz108.
- 503 13. Cameron PU, Freudenthal PS, Barker JM, Gezelter S, Inaba K, Steinman RM. 1992. Dendritic cells  
504 exposed to human immunodeficiency virus type-1 transmit a vigorous cytopathic infection to  
505 CD4+ T cells. *Science* 257:383-7.
- 506 14. Geijtenbeek TB, Kwon DS, Torensma R, van Vliet SJ, van Duijnhoven GC, Middel J, Cornelissen IL,  
507 Nottet HS, KewalRamani VN, Littman DR, Figdor CG, van Kooyk Y. 2000. DC-SIGN, a dendritic  
508 cell-specific HIV-1-binding protein that enhances trans-infection of T cells. *Cell* 100:587-97.
- 509 15. Rappocciolo G, Piazza P, Fuller CL, Reinhart TA, Watkins SC, Rowe DT, Jais M, Gupta P, Rinaldo  
510 CR. 2006. DC-SIGN on B lymphocytes is required for transmission of HIV-1 to T lymphocytes.  
511 *PLoS Pathog* 2:e70.
- 512 16. Sigal A, Baltimore D. 2012. As good as it gets? The problem of HIV persistence despite  
513 antiretroviral drugs. *Cell Host Microbe* 12:132-8.
- 514 17. Zhong P, Agosto LM, Ilinskaya A, Dorjbal B, Truong R, Derse D, Uchil PD, Heidecker G, Mothes W.  
515 2013. Cell-to-cell transmission can overcome multiple donor and target cell barriers imposed on  
516 cell-free HIV. *PLoS One* 8:e53138.
- 517 18. DeLucia DC, Rinaldo CR, Rappocciolo G. 2018. Inefficient HIV-1 trans Infection of CD4(+) T Cells  
518 by Macrophages from HIV-1 Nonprogressors Is Associated with Altered Membrane Cholesterol  
519 and DC-SIGN. *J Virol* 92.
- 520 19. Rappocciolo G, Jais M, Piazza P, Reinhart TA, Berendam SJ, Garcia-Exposito L, Gupta P, Rinaldo  
521 CR. 2014. Alterations in cholesterol metabolism restrict HIV-1 trans infection in nonprogressors.  
522 *MBio* 5:e01031-13.
- 523 20. Sankapal S, Gupta P, Ratner D, Ding M, Shen C, Sanyal A, Stolz D, Cu-Uvin S, Ramratnam B, Chen  
524 Y. 2016. HIV Exposure to the Epithelia in Ectocervical and Colon Tissues Induces Inflammatory  
525 Cytokines Without Tight Junction Disruption. *AIDS Res Hum Retroviruses* 32:1054-1066.
- 526 21. Brown BK, Darden JM, Tovanabutra S, Oblander T, Frost J, Sanders-Buell E, de Souza MS, Birx DL,  
527 McCutchan FE, Polonis VR. 2005. Biologic and genetic characterization of a panel of 60 human  
528 immunodeficiency virus type 1 isolates, representing clades A, B, C, D, CRF01\_AE, and  
529 CRF02\_AG, for the development and assessment of candidate vaccines. *J Virol* 79:6089-101.
- 530 22. Rappocciolo G, Sluis-Cremer N, Rinaldo CR. 2019. Efficient HIV-1 Trans Infection of CD4(+) T Cells  
531 Occurs in the Presence of Antiretroviral Therapy. *Open Forum Infect Dis* 6:ofz253.
- 532 23. Hong F, Aga E, Cillo AR, Yates AL, Besson G, Fyne E, Koontz DL, Jennings C, Zheng L, Mellors JW.  
533 2016. Novel Assays for Measurement of Total Cell-Associated HIV-1 DNA and RNA. *J Clin*  
534 *Microbiol* 54:902-11.
- 535 24. Rappocciolo G, Jenkins FJ, Hensler HR, Piazza P, Jais M, Borowski L, Watkins SC, Rinaldo CR, Jr.  
536 2006. DC-SIGN is a receptor for human herpesvirus 8 on dendritic cells and macrophages. *J*  
537 *Immunol* 176:1741-9.
- 538 25. Heeregrave EJ, Geels MJ, Brenchley JM, Baan E, Ambrozak DR, van der Sluis RM, Bennemeer R,  
539 Douek DC, Goudsmit J, Pollakis G, Koup RA, Paxton WA. 2009. Lack of in vivo  
540 compartmentalization among HIV-1 infected naive and memory CD4+ T cell subsets. *Virology*  
541 393:24-32.
- 542 26. Venanzi Rullo E, Cannon L, Pinzone MR, Ceccarelli M, Nunnari G, O'Doherty U. 2019. Genetic  
543 Evidence That Naive T Cells Can Contribute Significantly to the Human Immunodeficiency Virus  
544 Intact Reservoir: Time to Re-evaluate Their Role. *Clin Infect Dis* 69:2236-2237.

- 545 27. Sigal A, Kim JT, Balazs AB, Dekel E, Mayo A, Milo R, Baltimore D. 2011. Cell-to-cell spread of HIV  
546 permits ongoing replication despite antiretroviral therapy. *Nature* 477:95-8.
- 547 28. Izquierdo-Useros N, Lorizate M, Puertas MC, Rodriguez-Plata MT, Zangger N, Erikson E, Pino M,  
548 Erkizia I, Glass B, Clotet B, Keppler OT, Telenti A, Krausslich HG, Martinez-Picado J. 2012. Siglec-1  
549 is a novel dendritic cell receptor that mediates HIV-1 trans-infection through recognition of viral  
550 membrane gangliosides. *PLoS Biol* 10:e1001448.
- 551 29. Saleh S, Solomon A, Wightman F, Xhiligaga M, Cameron PU, Lewin SR. 2007. CCR7 ligands CCL19  
552 and CCL21 increase permissiveness of resting memory CD4+ T cells to HIV-1 infection: a novel  
553 model of HIV-1 latency. *Blood* 110:4161-4.
- 554 30. Turville SG, Santos JJ, Frank I, Cameron PU, Wilkinson J, Miranda-Saksena M, Dable J, Stossel H,  
555 Romani N, Piatak M, Jr., Lifson JD, Pope M, Cunningham AL. 2004. Immunodeficiency virus  
556 uptake, turnover, and 2-phase transfer in human dendritic cells. *Blood* 103:2170-9.
- 557 31. Sattentau Q. 2008. Avoiding the void: cell-to-cell spread of human viruses. *Nat Rev Microbiol*  
558 6:815-26.
- 559 32. Hong S, Zhang Z, Liu H, Tian M, Zhu X, Zhang Z, Wang W, Zhou X, Zhang F, Ge Q, Zhu B, Tang H,  
560 Hua Z, Hou B. 2018. B Cells Are the Dominant Antigen-Presenting Cells that Activate Naive  
561 CD4(+) T Cells upon Immunization with a Virus-Derived Nanoparticle Antigen. *Immunity* 49:695-  
562 708 e4.
- 563 33. Cyster JG. 2010. B cell follicles and antigen encounters of the third kind. *Nat Immunol* 11:989-  
564 96.
- 565 34. Batista FD, Harwood NE. 2009. The who, how and where of antigen presentation to B cells. *Nat*  
566 *Rev Immunol* 9:15-27.
- 567 35. Carrasco YR, Batista FD. 2007. B cells acquire particulate antigen in a macrophage-rich area at  
568 the boundary between the follicle and the subcapsular sinus of the lymph node. *Immunity*  
569 27:160-71.
- 570 36. Katakai T, Suto H, Sugai M, Gonda H, Togawa A, Suematsu S, Ebisuno Y, Katagiri K, Kinashi T,  
571 Shimizu A. 2008. Organizer-like reticular stromal cell layer common to adult secondary lymphoid  
572 organs. *J Immunol* 181:6189-200.
- 573 37. He B, Qiao X, Klasse PJ, Chiu A, Chadburn A, Knowles DM, Moore JP, Cerutti A. 2006. HIV-1  
574 envelope triggers polyclonal Ig class switch recombination through a CD40-independent  
575 mechanism involving BAFF and C-type lectin receptors. *J Immunol* 176:3931-41.
- 576 38. Cyster JG, Allen CDC. 2019. B Cell Responses: Cell Interaction Dynamics and Decisions. *Cell*  
577 177:524-540.
- 578 39. Allen CD, Okada T, Cyster JG. 2007. Germinal-center organization and cellular dynamics.  
579 *Immunity* 27:190-202.
- 580 40. Qi H, Kastenmuller W, Germain RN. 2014. Spatiotemporal basis of innate and adaptive immunity  
581 in secondary lymphoid tissue. *Annu Rev Cell Dev Biol* 30:141-67.
- 582 41. Zaretsky I, Atrakchi O, Mazor RD, Stoler-Barak L, Biram A, Feigelson SW, Gitlin AD, Engelhardt B,  
583 Shulman Z. 2017. ICAMs support B cell interactions with T follicular helper cells and promote  
584 clonal selection. *J Exp Med* 214:3435-3448.
- 585 42. Saez-Cirion A, Bacchus C, Hocqueloux L, Avettand-Fenoel V, Girault I, Lecuroux C, Potard V,  
586 Versmisse P, Melard A, Prazuck T, Descours B, Guergnon J, Viard JP, Boufassa F, Lambotte O,  
587 Goujard C, Meyer L, Costagliola D, Venet A, Pancino G, Autran B, Rouzioux C, Group AVS. 2013.  
588 Post-treatment HIV-1 controllers with a long-term virological remission after the interruption of  
589 early initiated antiretroviral therapy ANRS VISCONTI Study. *PLoS Pathog* 9:e1003211.

590

591

592

593



Figure 1

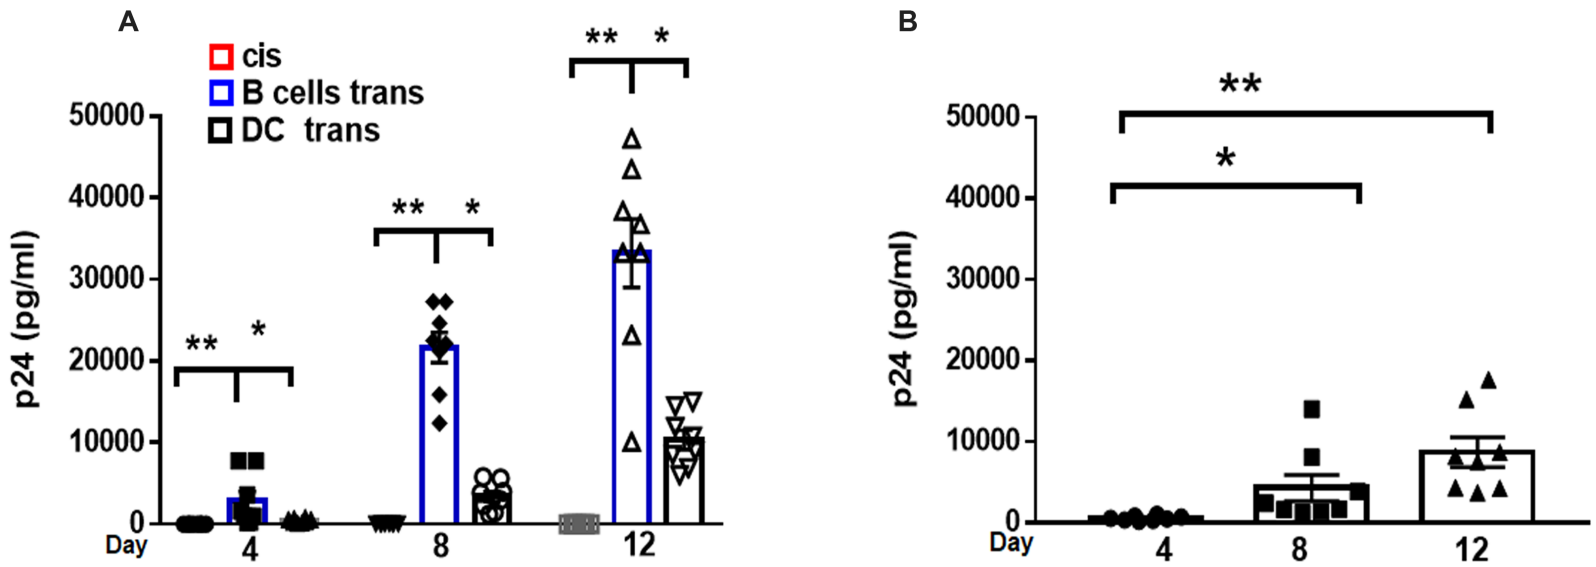

Figure 2

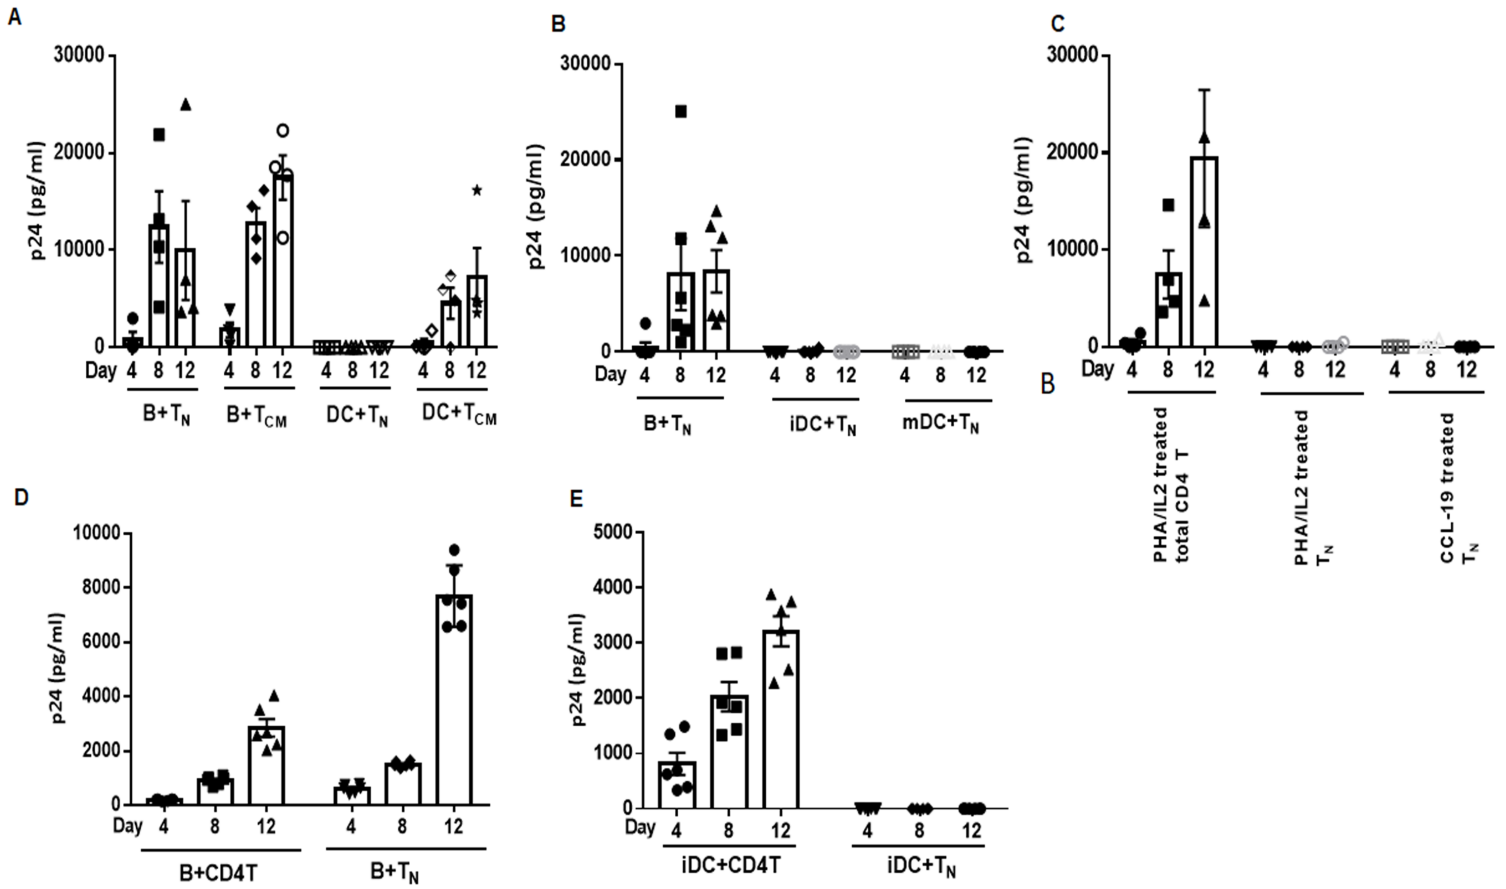

Figure 3

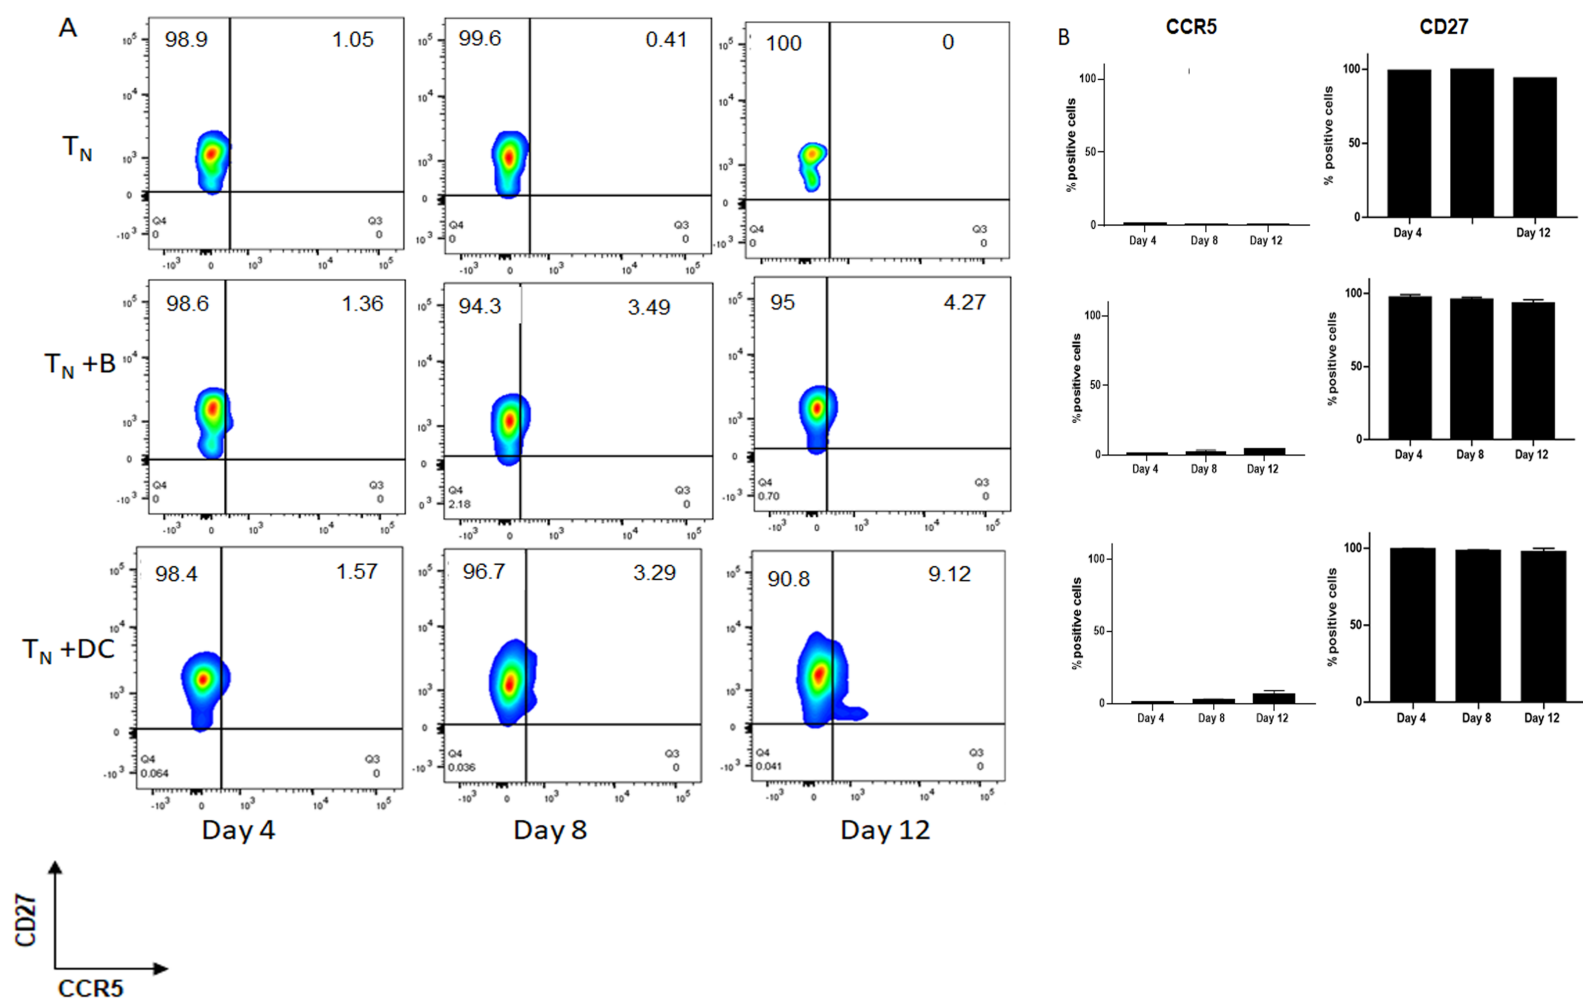

Figure 4

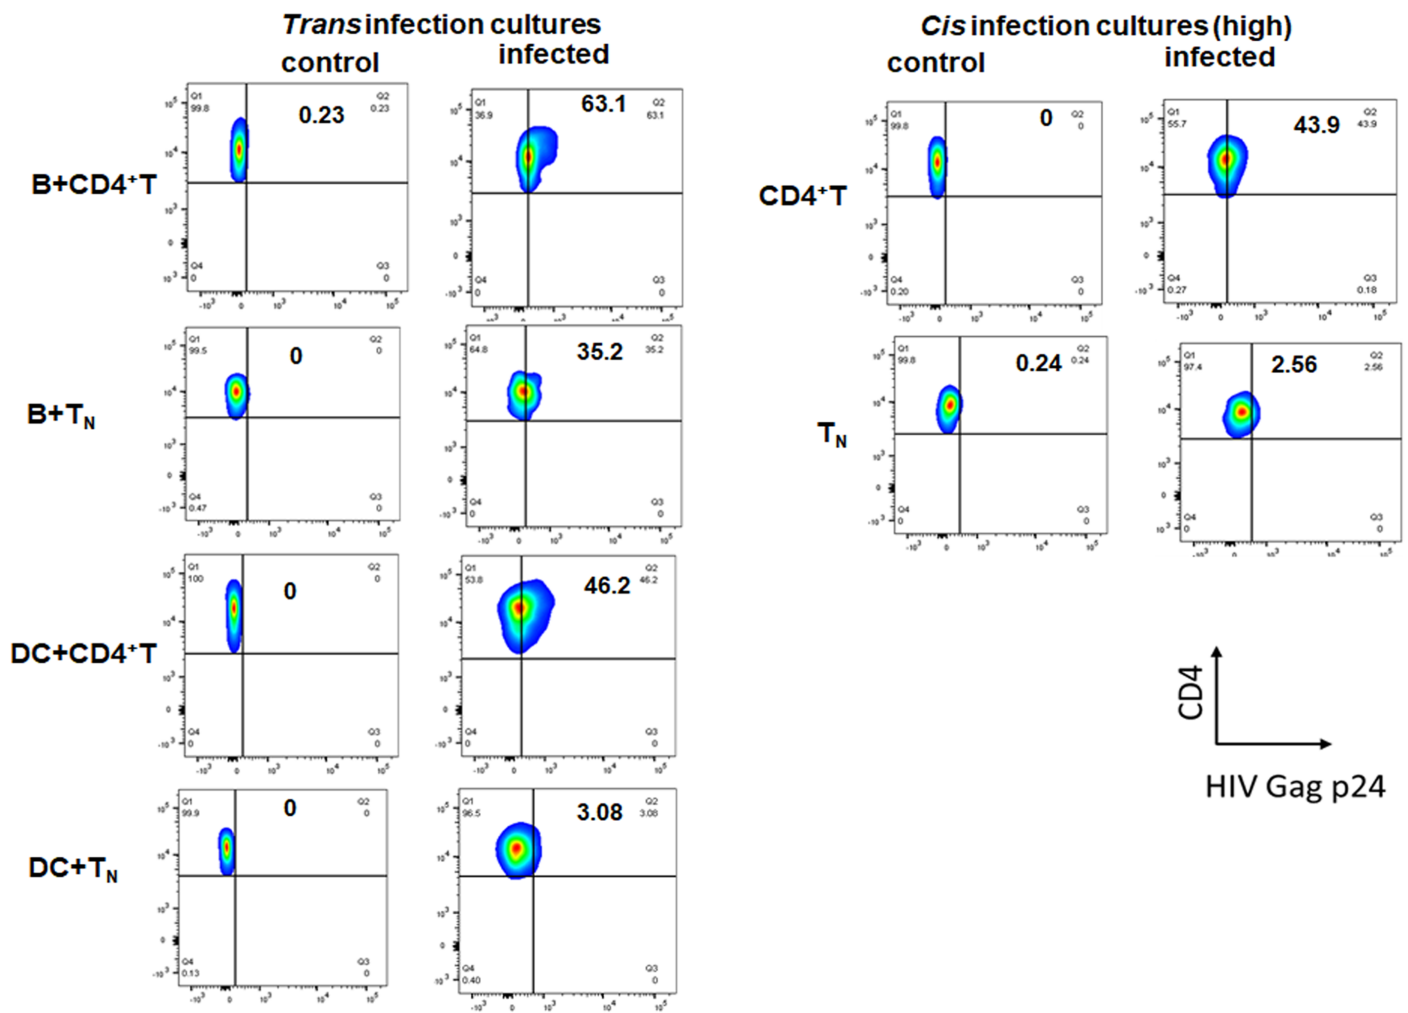

Figure 5

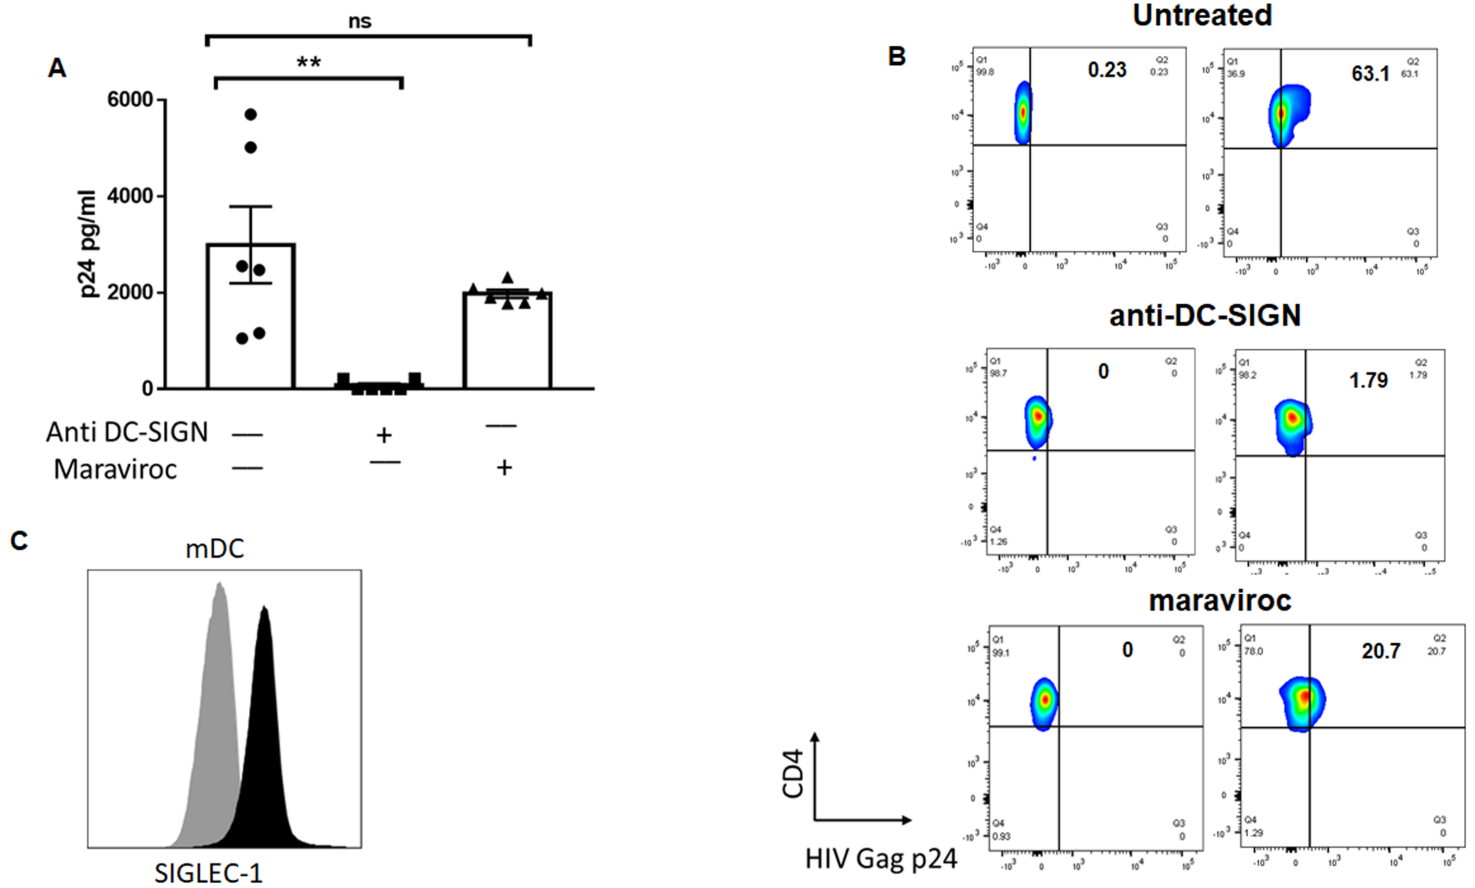

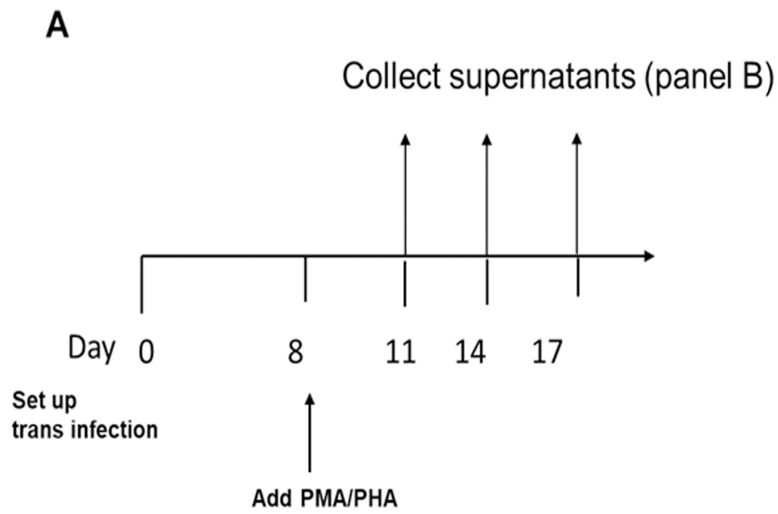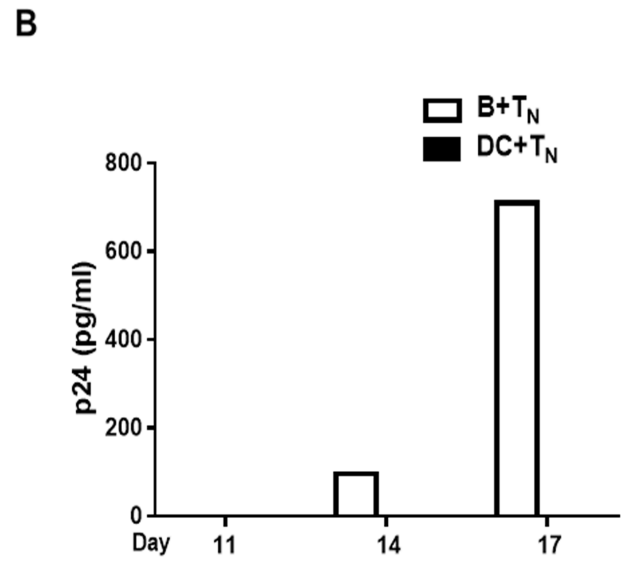

Figure 7

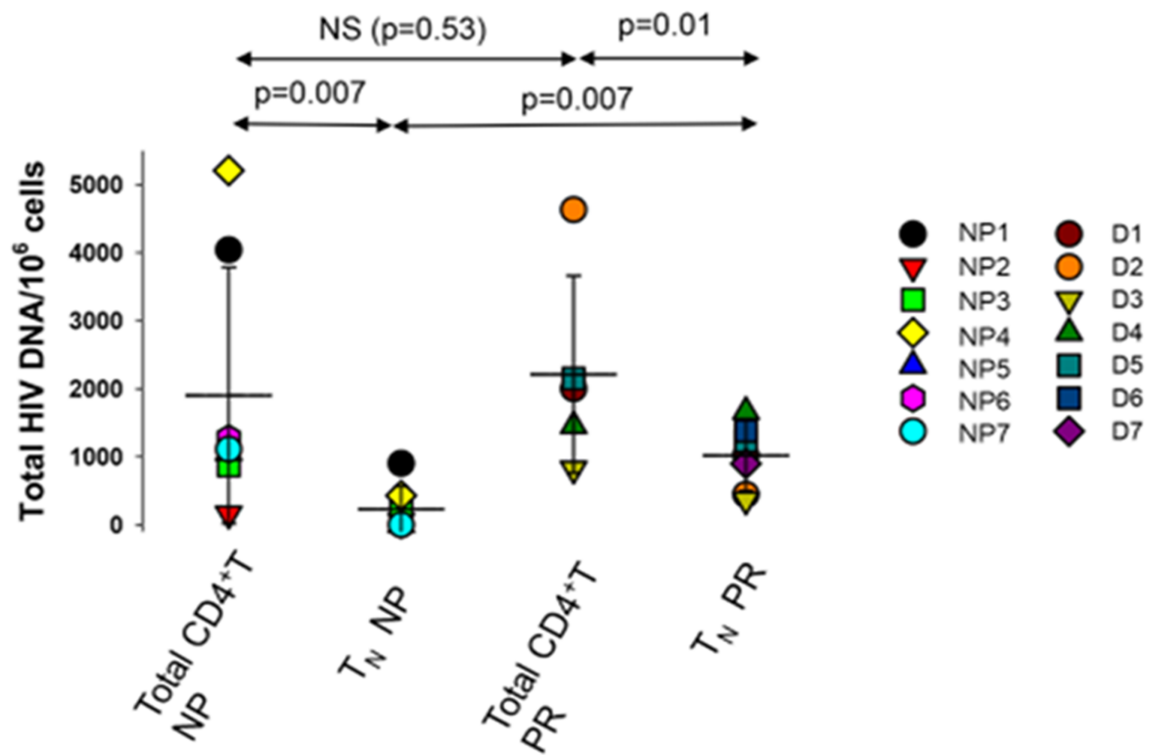

Source: https://biorxiv.org/content/10.1101/2020.10.22.351627v1.full.pdf
